# Supplementary material for: Anomalous In Vitro Corrosion Behaviour of Rolled Mg-1 wt. % Zn Alloy Due to Buffer-Microstructure Interactions
Source: MDPI journal article supplement (doi:10.3390/cryst12101491), 2022-10-20
Supplement: s1 [file s1]

Supplementary material

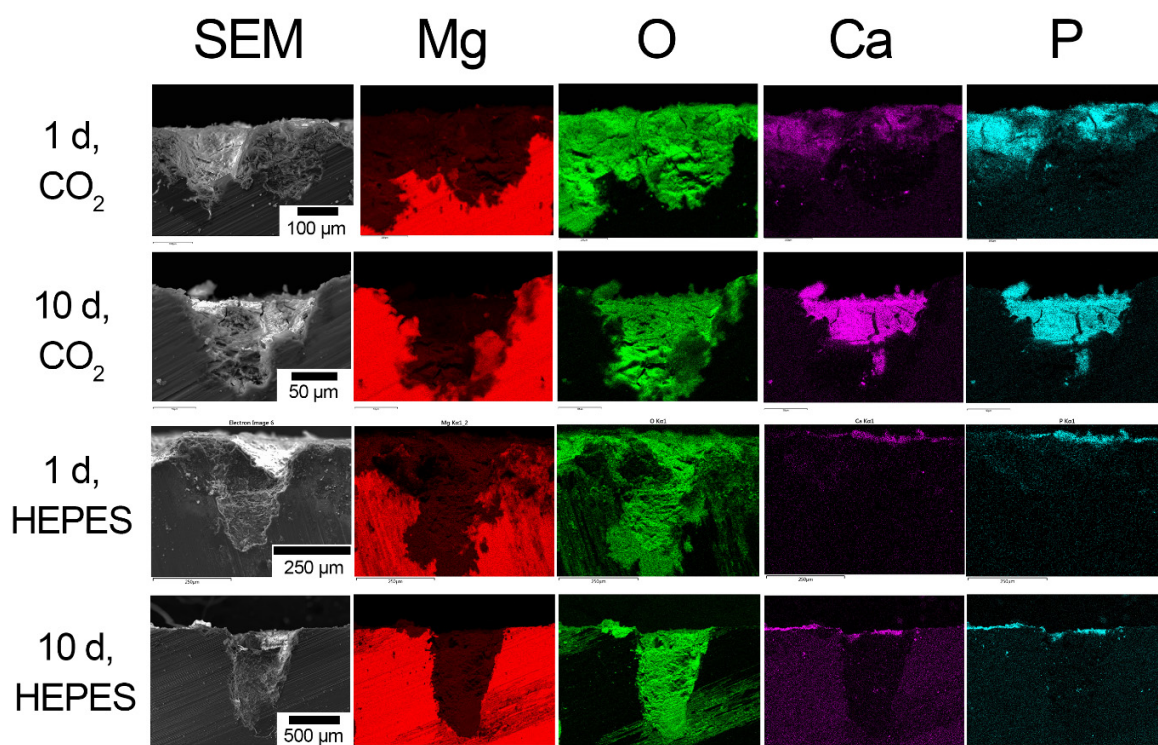

Figure S1: Scanning electron micrographs and corresponding elemental EDS maps taken from the transverse plane of R30 as a function of the buffer system and immersion time in EBSS.

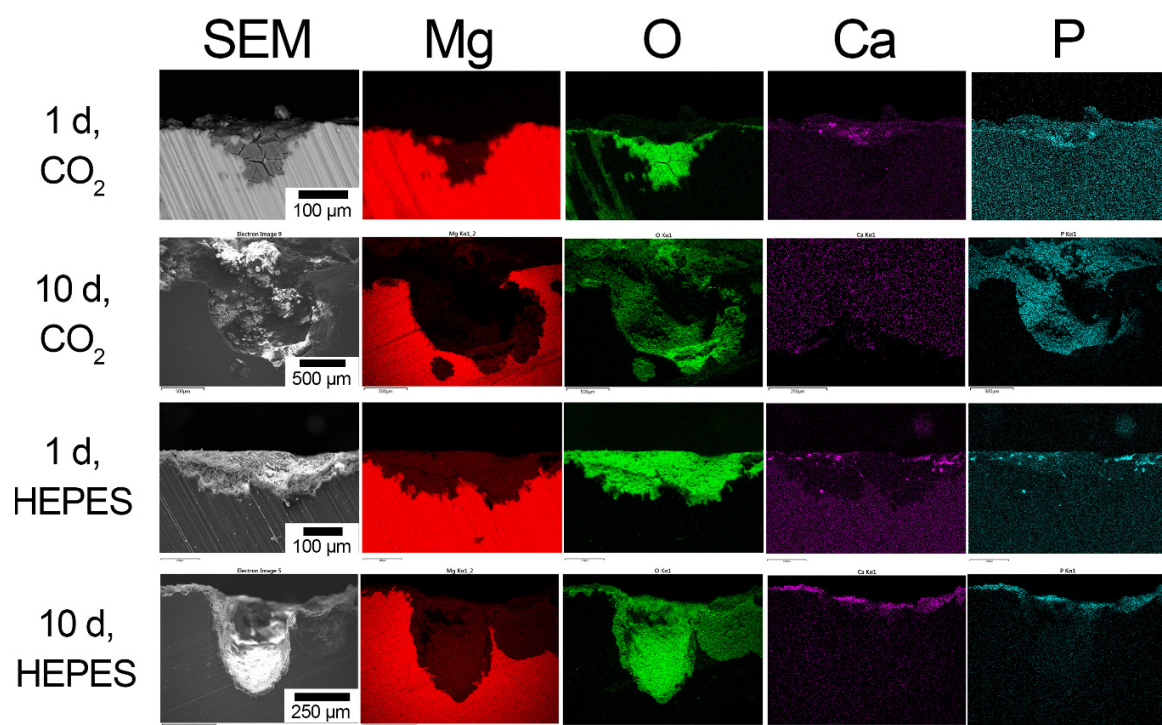

Figure S2: Scanning electron micrographs and corresponding elemental EDS maps taken from the transverse plane of R40 as a function of the buffer system and immersion time in EBSS.
