# Supplementary material for: Anomalous In Vitro Corrosion Behaviour of Rolled Mg-1 wt. % Zn Alloy Due to Buffer-Microstructure Interactions
Source: MDPI journal article supplement (doi:10.3390/cryst12101491), 2022-10-20
Supplement: s1 [file s1]

Archive with 1 entries (1 files):
- crystals-1939903-supplementary.pdf
